# Supplementary material for: Structural Elucidation of Alkali Degradation Impurities of Favipiravir from the Oral Suspension: UPLC-TQ-ESI-MS/MS and NMR
Source: MDPI journal article supplement (doi:10.3390/molecules27175606), 2022-08-31
Supplement: s1 [file s1]

Article

# Structure elucidation of alkali degradation impurity of Favipiravir from the oral suspension: UPLC-TQ-ESI-MS/MS and NMR

Ravi Patel<sup>1,\*</sup>, Abhishek Dube<sup>1</sup>, Ravishinh Solanki<sup>1</sup>, Dignesh Khunt<sup>1</sup>, Shalin Parikh<sup>2</sup>,  
Vijayabhaskarreddy Junnuthula<sup>3,\*</sup>, Sathish Dyawanapelly<sup>4,\*</sup>

<sup>1</sup> Graduate School of Pharmacy, Gujarat Technological University, Gandhinagar, 382028, Gujarat, India

<sup>2</sup> Senores Pharmaceuticals Pvt. Ltd., Ahmedabad, 380058, Gujarat, India

<sup>3</sup> Drug Research Program, Faculty of Pharmacy, University of Helsinki, Viikinkaari 5 E, 00790, Helsinki, Finland

<sup>4</sup> Department of Pharmaceutical Sciences and Technology, Institute of Chemical Technology, Mumbai, 400019, India

\* Correspondence: ravipatel.qa@gmail.com (R.P.); sa.dyawanapelly@ictmumbai.edu.in (S.D.); junnuthula.vijayabhaskarreddy@helsinki.fi (V.J.)

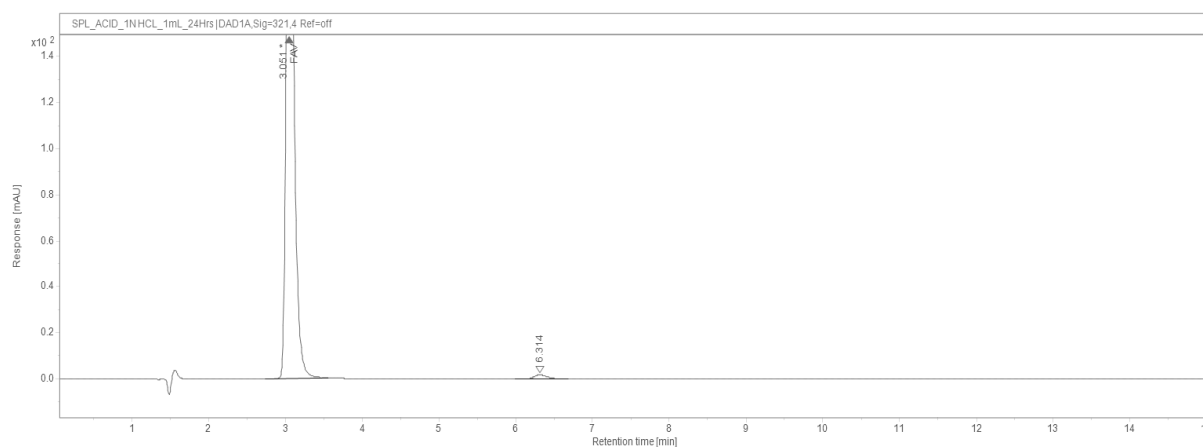

Figure S1: Acid Degradation Sample (1N HCl\_1mL\_24h)

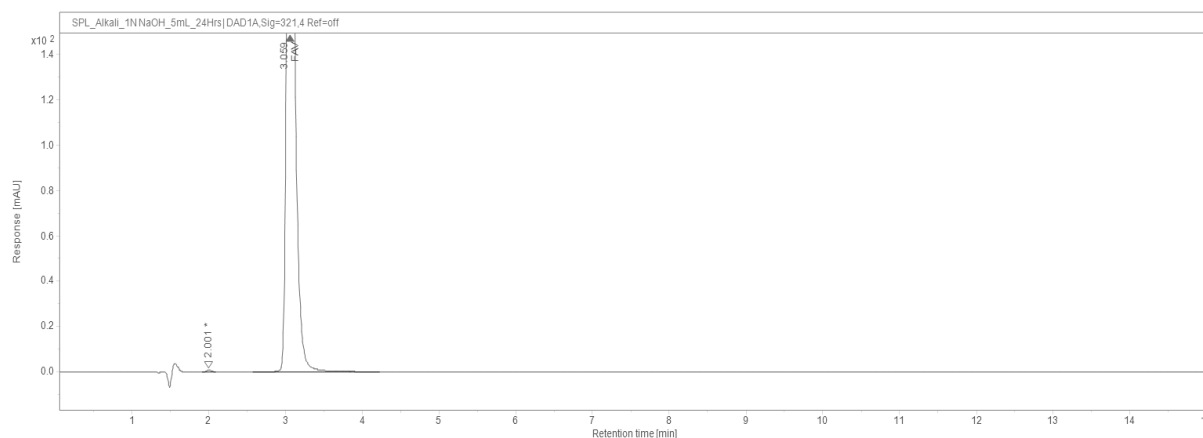

Figure S2: Alkali Degradation Sample (1N NaOH\_5mL\_24h)

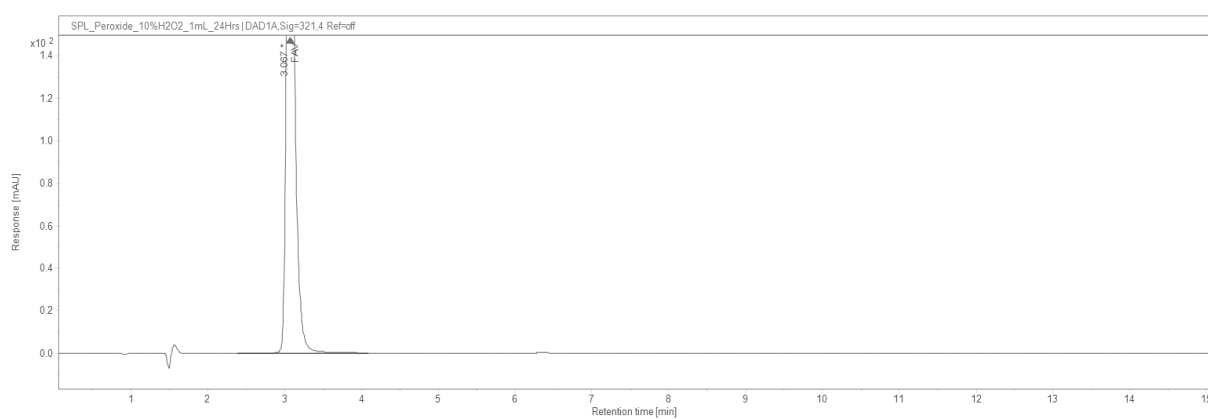Figure S3: Peroxide Degradation Sample (10% $\text{H}_2\text{O}_2$ \_1mL\_24h)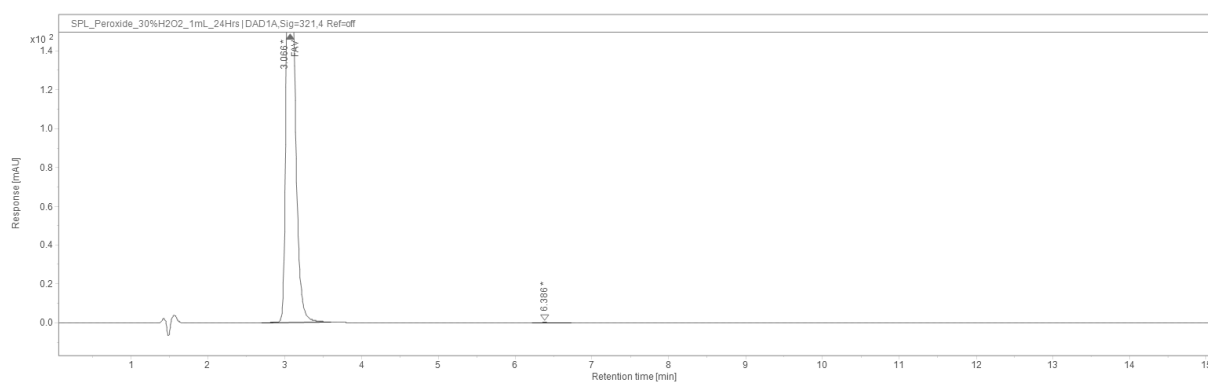Figure S4: Peroxide Degradation Sample (30% $\text{H}_2\text{O}_2$ \_1mL\_24h)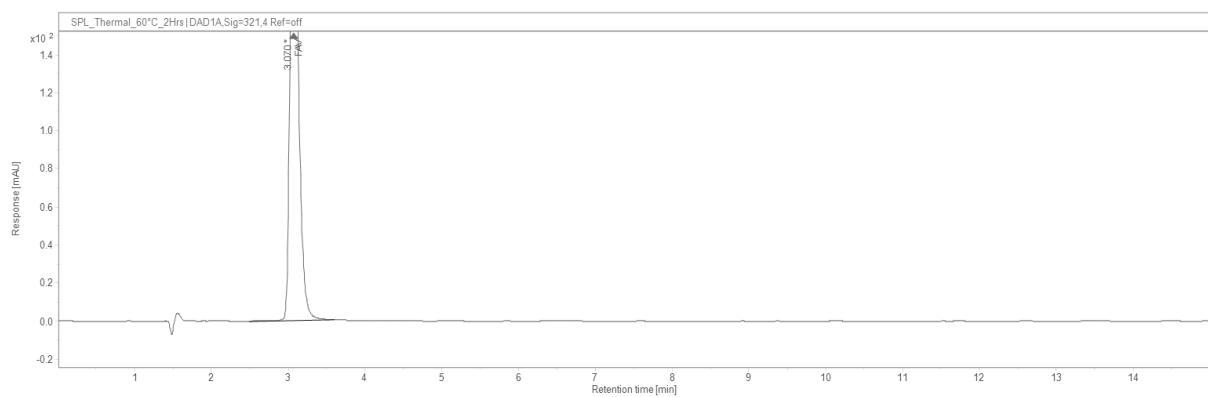

Figure S5: Thermal Degradation Sample (60°C\_2h)

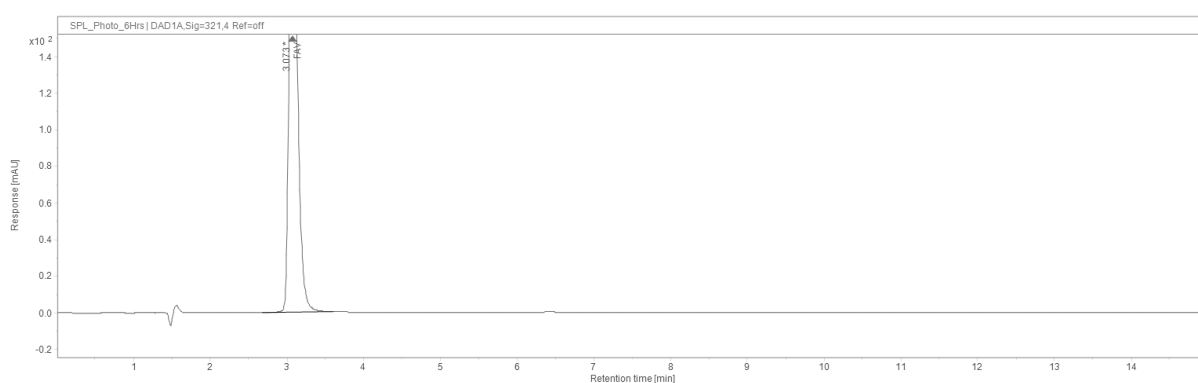

Figure S6: Photolytic Degradation Sample (UV chamber at 254nm, 6h)

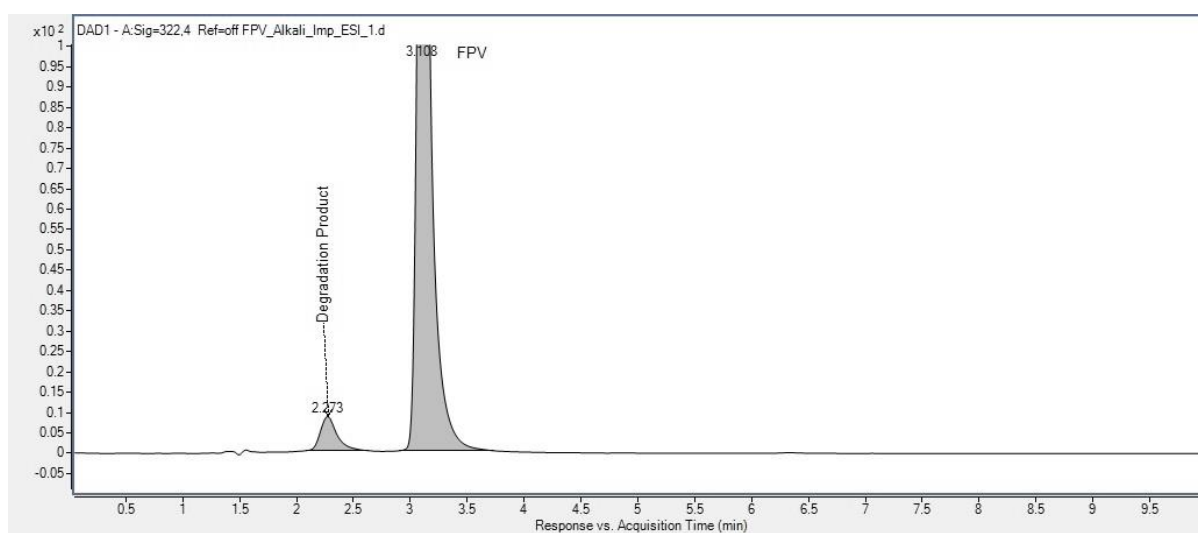

Figure S7: UPLC-DAD chromatogram of alkali hydrolysis sample (Intermediate Precision)

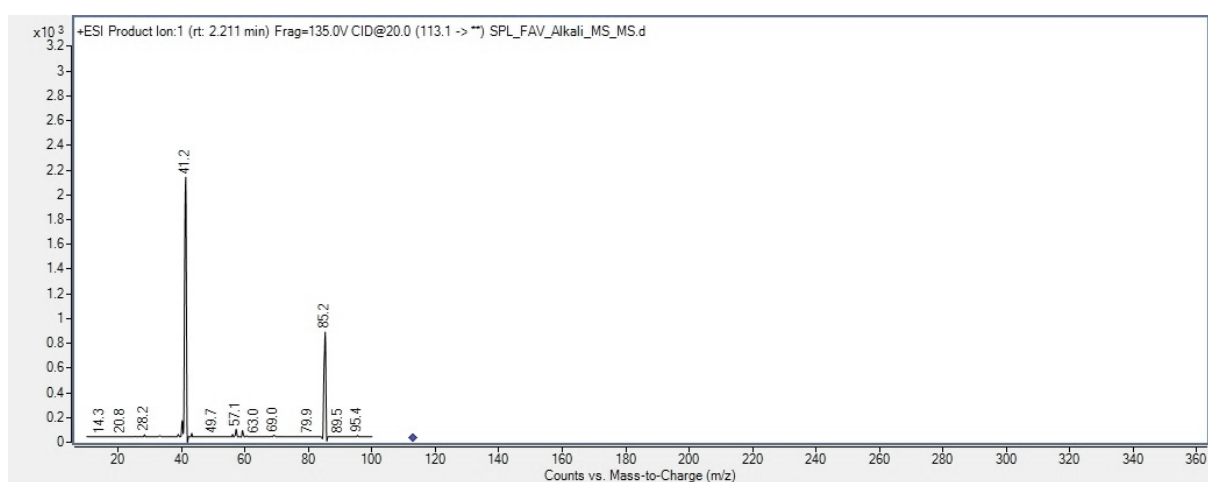

Figure S8: MS/MS Product ion scan of alkali degradation product (Positive ion mode)

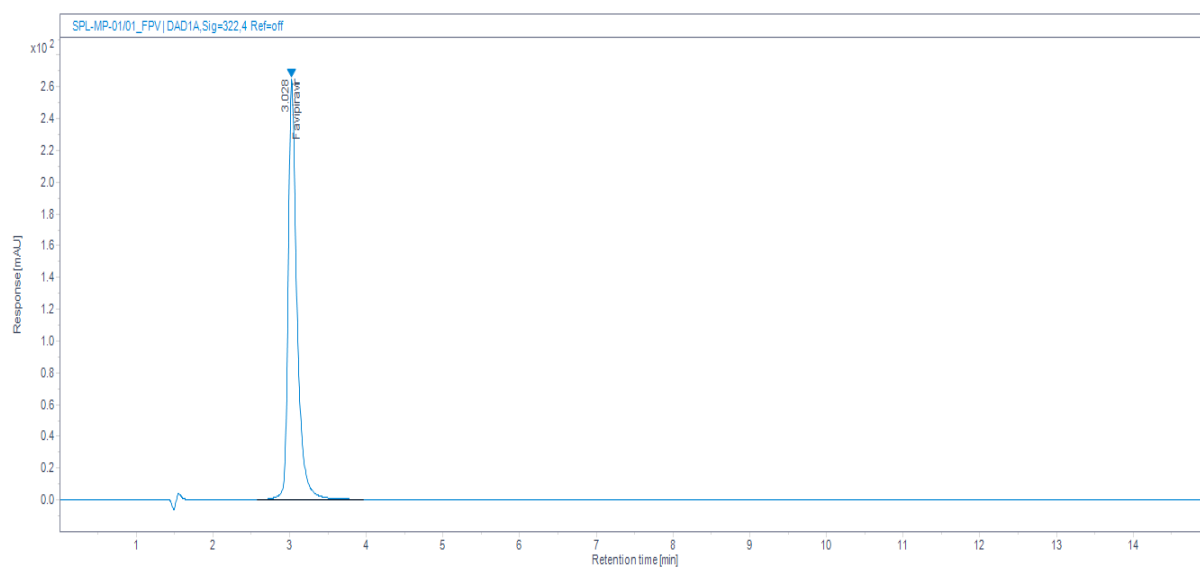

Figure S9: Chromatogram of Favipiravir sample solution

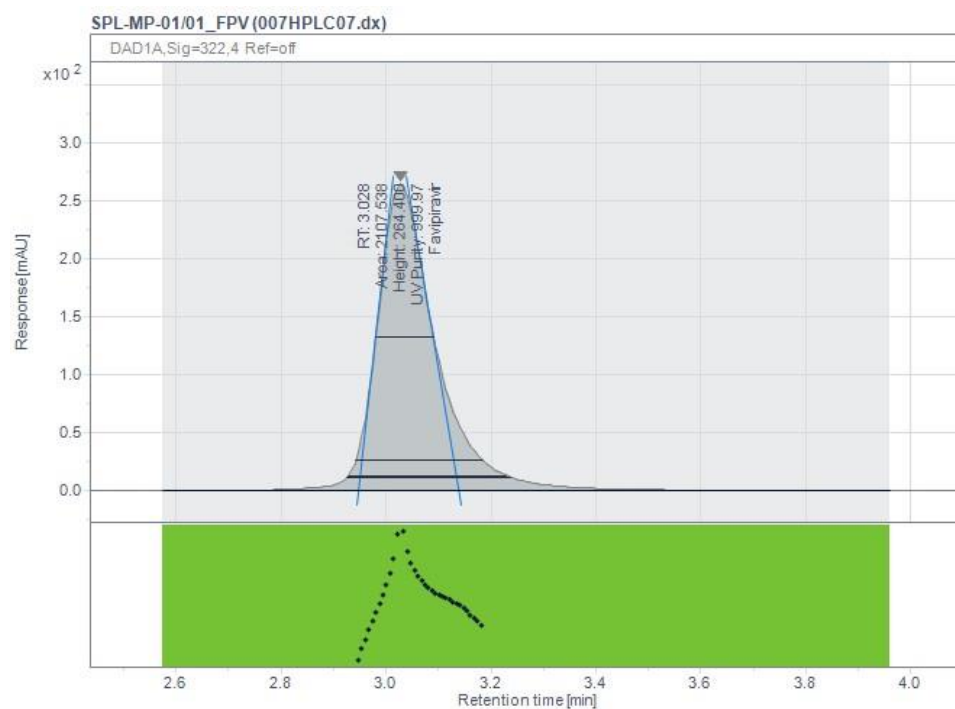

Figure S10: Peak Purity spectra of favipiravir peak from sample solution
